# Supplementary material for: Community group membership and multidimensional subjective well-being in older age
Source: J Epidemiol Community Health. 2018 Feb 9;72(5):376–82. doi: 10.1136/jech-2017-210260 (PMC5909739; doi:10.1136/jech-2017-210260)
Supplement: Supplementary file 1 [file jech-2017-210260supp001.pdf]

**Table S1: Regression coefficients showing associations between club and society membership and wellbeing, additionally controlling for frequency of club attendance**

|                               | Experienced     |                  |                 |                  | Evaluative        |            | Eudemonic        |                  |                  |            |
|-------------------------------|-----------------|------------------|-----------------|------------------|-------------------|------------|------------------|------------------|------------------|------------|
|                               | Negative affect |                  | Positive affect |                  | Life satisfaction |            | Control-autonomy |                  | Self-realisation |            |
|                               | OR              | CI               | OR              | CI               | $\beta$           | CI         | $\beta$          | CI               | $\beta$          | CI         |
| Education, arts, music        | <b>0.73</b>     | <b>0.58-0.92</b> | 0.94            | 0.74-1.20        | 0.52              | -0.01-1.05 | 0.17             | -0.09-0.42       | 0.05             | -0.21-0.32 |
| Church or religious           | <b>0.81</b>     | <b>0.65-1.00</b> | <b>1.44</b>     | <b>1.16-1.79</b> | 0.10              | -0.37-0.58 | 0.02             | -0.21-0.25       | -0.01            | -0.25-0.22 |
| Sports or exercise            | 0.88            | 0.72-1.07        | 1.08            | 0.88-1.33        | 0.04              | -0.41-0.49 | <b>0.17</b>      | <b>0.05-0.38</b> | 0.05             | -0.17-0.28 |
| Charitable                    | 1.16            | 0.92-1.45        | 0.89            | 0.71-1.13        | 0.23              | -0.28-0.74 | -0.18            | -0.42-0.06       | 0.01             | -0.25-0.26 |
| Social clubs                  | 1.07            | 0.87-1.33        | 0.97            | 0.77-1.21        | -0.04             | -0.52-0.44 | -0.02            | -0.25-0.22       | 0.05             | -0.19-0.29 |
| Political, union, environment | 1.00            | 0.78-1.26        | 1.07            | 0.83-1.37        | -0.20             | -0.74-0.35 | -0.11            | -0.38-0.15       | 0.03             | -0.24-0.30 |
| Resident or neighbourhood     | 0.96            | 0.78-1.18        | 1.10            | 0.89-1.37        | 0.07              | -0.40-0.53 | -0.06            | -0.16-0.29       | 0.10             | -0.14-0.33 |
| Other                         | 0.93            | 0.76-1.12        | 0.90            | 0.74-1.10        | -0.22             | -0.62-0.26 | -0.05            | -0.16-0.26       | 0.06             | -0.16-0.28 |

OR=odds ratio (logistic regression models);  $\beta$ =beta coefficient (linear regression models); CI=confidence intervals. Adjusted for baseline wellbeing, sex, age, marital status, ethnicity, educational attainment, employment status, wealth, eyesight, hearing, having a chronic health condition (including cancer, COPD, arthritis, diabetes or angina) or having had a chronic health condition in the last 2 years (including cancer and a stroke), chronic pain and frequency of club attendance.

**Table S2: Regression coefficients showing associations between club and society membership and wellbeing, additionally controlling for informal engagement**

|                               | Experienced     |                  |                 |                  | Evaluative        |            | Eudemonic        |            |                  |            |
|-------------------------------|-----------------|------------------|-----------------|------------------|-------------------|------------|------------------|------------|------------------|------------|
|                               | Negative affect |                  | Positive affect |                  | Life satisfaction |            | Control-autonomy |            | Self-realisation |            |
|                               | OR              | CI               | OR              | CI               | $\beta$           | CI         | $\beta$          | CI         | $\beta$          | CI         |
| Education, arts, music        | <b>0.74</b>     | <b>0.59-0.94</b> | 0.98            | 0.76-1.25        | 0.51              | -0.02-1.04 | 0.16             | -0.10-0.41 | 0.03             | -0.23-0.30 |
| Church or religious           | <b>0.80</b>     | <b>0.65-0.98</b> | <b>1.55</b>     | <b>1.25-1.91</b> | 0.17              | -0.30-0.63 | 0.04             | -0.18-0.26 | 0.01             | -0.22-0.24 |
| Sports or exercise            | 0.89            | 0.73-1.08        | 1.12            | 0.91-1.37        | 0.02              | -0.43-0.48 | 0.15             | -0.07-0.37 | 0.02             | -0.20-0.25 |
| Charitable                    | 1.13            | 0.91-1.41        | 0.98            | 0.78-1.23        | 0.32              | -0.17-0.81 | -0.15            | -0.38-0.09 | 0.04             | -0.20-0.29 |
| Social clubs                  | 1.07            | 0.86-1.32        | 0.98            | 0.78-1.23        | -0.03             | -0.51-0.46 | -0.01            | -0.25-0.22 | 0.05             | -0.19-0.29 |
| Political, union, environment | 1.00            | 0.79-1.27        | 1.08            | 0.84-1.39        | -0.20             | -0.74-0.34 | -0.12            | -0.38-0.14 | 0.02             | -0.25-0.29 |
| Resident or neighbourhood     | 0.95            | 0.78-1.17        | 1.14            | 0.92-1.42        | -0.10             | -0.37-0.56 | 0.07             | -0.15-0.30 | 0.11             | -0.13-0.34 |
| Other                         | 0.93            | 0.77-1.12        | 0.97            | 0.80-1.18        | -0.13             | -0.57-0.29 | 0.06             | -0.15-0.27 | 0.06             | -0.15-0.28 |

OR=odds ratio (logistic regression models);  $\beta$ =beta coefficient (linear regression models); CI=confidence intervals. Adjusted for baseline wellbeing, sex, age, marital status, ethnicity, educational attainment, employment status, wealth, eyesight, hearing, having a chronic health condition (including cancer, COPD, arthritis, diabetes or angina) or having had a chronic health condition in the last 2 years (including cancer and a stroke), chronic pain, informal hobby/pastime engagement and informal social engagement with relatives.

**Table S3: Regression coefficients showing associations between club and society membership and wellbeing, excluding participants with mobility issues affecting their walking**

|                               | Experienced     |                  |                 |                  | Evaluative        |                  | Eudemonic        |            |                  |            |
|-------------------------------|-----------------|------------------|-----------------|------------------|-------------------|------------------|------------------|------------|------------------|------------|
|                               | Negative affect |                  | Positive affect |                  | Life satisfaction |                  | Control-autonomy |            | Self-realisation |            |
|                               | OR              | CI               | OR              | CI               | $\beta$           | CI               | $\beta$          | CI         | $\beta$          | CI         |
| Education, arts, music        | <b>0.71</b>     | <b>0.56-0.90</b> | 0.95            | 0.74-1.21        | <b>0.59</b>       | <b>0.06-1.13</b> | 0.18             | -0.08-0.43 | 0.08             | -0.18-0.35 |
| Church or religious           | <b>0.83</b>     | <b>0.67-1.02</b> | <b>1.49</b>     | <b>1.20-1.86</b> | 0.11              | -0.36-0.59       | 0.02             | -0.21-0.25 | 0.03             | -0.21-0.27 |
| Sports or exercise            | 0.86            | 0.71-1.06        | 1.11            | 0.91-1.37        | 0.11              | -0.34-0.56       | 0.18             | -0.04-0.39 | 0.08             | -0.14-0.31 |
| Charitable                    | 1.12            | 0.89-1.39        | 1.02            | 0.81-1.28        | 0.34              | -0.16-0.84       | -0.12            | -0.36-0.12 | 0.08             | -0.17-0.33 |
| Social clubs                  | 1.05            | 0.84-1.31        | 0.97            | 0.77-1.22        | -0.12             | -0.62-0.37       | -0.02            | -0.22-0.25 | 0.01             | -0.23-0.26 |
| Political, union, environment | 1.00            | 0.78-1.27        | 1.09            | 0.85-1.40        | -0.14             | -0.69-0.41       | -0.10            | -0.37-0.16 | 0.03             | -0.24-0.30 |
| Resident or neighbourhood     | 0.97            | 0.78-1.20        | 1.15            | 0.92-1.43        | 0.16              | -0.31-0.63       | 0.07             | -0.16-0.30 | 0.20             | -0.03-0.44 |
| Other                         | 0.93            | 0.77-1.13        | 0.99            | 0.81-1.21        | -0.15             | -0.58-0.29       | 0.07             | -0.14-0.28 | 0.08             | -0.13-0.30 |

OR=odds ratio (logistic regression models);  $\beta$ =beta coefficient (linear regression models); CI=confidence intervals.

Adjusted for baseline wellbeing, sex, age, marital status, ethnicity, educational attainment, employment status, wealth, eyesight, hearing, having a chronic health condition (including cancer, COPD, arthritis, diabetes or angina) or having had a chronic health condition in the last 2 years (including cancer and a stroke) and chronic pain. N=2,385.

**Table S4: Regression coefficients showing associations between club and society membership and wellbeing, weighted to account for non-response**

|                               | Experienced     |                  |                 |                  | Evaluative        |                  | Eudemonic        |            |                  |            |
|-------------------------------|-----------------|------------------|-----------------|------------------|-------------------|------------------|------------------|------------|------------------|------------|
|                               | Negative affect |                  | Positive affect |                  | Life satisfaction |                  | Control-autonomy |            | Self-realisation |            |
|                               | OR              | CI               | OR              | CI               | $\beta$           | CI               | $\beta$          | CI         | $\beta$          | CI         |
| Education, arts, music        | <b>0.71</b>     | <b>0.56-0.90</b> | 0.95            | 0.75-1.22        | <b>0.56</b>       | <b>0.07-1.06</b> | 0.17             | -0.07-0.41 | 0.05             | -0.21-0.31 |
| Church or religious           | <b>0.77</b>     | <b>0.62-0.95</b> | <b>1.50</b>     | <b>1.21-1.87</b> | 0.12              | -0.37-0.61       | 0.02             | -0.21-0.25 | 0.01             | -0.23-0.25 |
| Sports or exercise            | 0.89            | 0.73-1.09        | 1.12            | 0.91-1.37        | 0.06              | -0.38-0.51       | 0.20             | -0.02-0.41 | 0.06             | -0.17-0.28 |
| Charitable                    | 1.18            | 0.95-1.47        | 0.99            | 0.79-1.25        | 0.37              | -0.12-0.85       | -0.18            | -0.42-0.06 | 0.02             | -0.23-0.28 |
| Social clubs                  | 1.04            | 0.83-1.29        | 0.99            | 0.78-1.24        | -0.01             | -0.50-0.48       | -0.02            | -0.27-0.22 | 0.06             | -0.18-0.30 |
| Political, union, environment | 1.00            | 0.78-1.28        | 1.05            | 0.82-1.35        | -0.14             | -0.68-0.41       | -0.13            | -0.39-0.14 | 0.02             | -0.23-0.28 |
| Resident or neighbourhood     | 0.96            | 0.78-1.19        | 1.13            | 0.91-1.40        | 0.11              | -0.36-0.58       | 0.07             | -0.16-0.29 | 0.12             | -0.12-0.36 |
| Other                         | 0.92            | 0.76-1.12        | 0.96            | 0.79-1.17        | -0.14             | -0.57-0.28       | 0.09             | -0.12-0.30 | 0.09             | -0.13-0.30 |

OR=odds ratio (logistic regression models);  $\beta$ =beta coefficient (linear regression models); CI=confidence intervals.

Adjusted for baseline wellbeing, sex, age, marital status, ethnicity, educational attainment, employment status, wealth, eyesight, hearing, having a chronic health condition (including cancer, COPD, arthritis, diabetes or angina) or having had a chronic health condition in the last 2 years (including cancer and a stroke) and chronic pain. N=2,385.

**Table S5: Regression coefficients showing associations between club and society membership and wellbeing, split by age**

|                               | Experienced     |                  |                 |                  | Evaluative        |                   | Eudemonic        |            |                  |             |
|-------------------------------|-----------------|------------------|-----------------|------------------|-------------------|-------------------|------------------|------------|------------------|-------------|
|                               | Negative affect |                  | Positive affect |                  | Life satisfaction |                   | Control-autonomy |            | Self-realisation |             |
|                               | OR              | CI               | OR              | CI               | $\beta$           | CI                | $\beta$          | CI         | $\beta$          | CI          |
| <b>Aged 55-64</b>             |                 |                  |                 |                  |                   |                   |                  |            |                  |             |
| Education, arts, music        | 0.82            | 0.59-1.12        | 1.08            | 0.77-1.50        | <b>0.75</b>       | <b>0.04-1.46</b>  | 0.16             | -0.17-0.48 | 0.16             | -0.18-0.50  |
| Church or religious           | 0.83            | 0.62-1.11        | <b>1.38</b>     | <b>1.03-1.85</b> | -0.15             | -0.79-0.49        | -0.04            | -0.33-0.25 | -0.23            | -0.54-0.07  |
| Sports or exercise            | 0.92            | 0.72-1.19        | 1.06            | 0.81-1.38        | 0.15              | -0.41-0.72        | 0.23             | -0.03-0.49 | 0.06             | -0.21-0.34  |
| Charitable                    | 1.16            | 0.87-1.55        | 1.08            | 0.80-1.45        | 0.71              | -0.07-1.35        | -0.17            | -0.47-0.12 | 0.31             | 0.003-0.62  |
| Social clubs                  | 1.09            | 0.82-1.46        | 1.14            | 0.84-1.55        | 0.11              | -0.52-0.75        | -0.21            | -0.08-0.51 | 0.27             | -0.04-0.58  |
| Political, union, environment | 0.80            | 0.59-1.08        | 1.25            | 0.91-1.72        | -0.24             | -0.91-0.43        | -0.22            | -0.53-0.09 | 0.05             | -0.28-0.37  |
| Resident or neighbourhood     | 0.97            | 0.73-1.28        | 1.4             | 0.78-1.39        | 0.37              | -0.25-0.99        | 0.22             | -0.06-0.50 | 0.21             | -0.09-0.51  |
| Other                         | 0.98            | 0.76-1.26        | 0.80            | 0.61-1.04        | -0.26             | -0.82-0.30        | -0.05            | -0.30-0.21 | -0.09            | -0.36-0.18  |
| <b>Aged 65+</b>               |                 |                  |                 |                  |                   |                   |                  |            |                  |             |
| Education, arts, music        | <b>0.64</b>     | <b>0.45-0.90</b> | 0.87            | 0.60-1.25        | <b>0.43</b>       | <b>-0.38-1.23</b> | 0.22             | -0.19-0.63 | -0.01            | -0.43-0.41  |
| Church or religious           | <b>0.78</b>     | <b>0.58-1.06</b> | <b>1.80</b>     | <b>1.32-2.45</b> | 0.67              | -0.02-1.36        | 0.19             | -0.16-0.54 | 0.36             | -0.004-0.71 |
| Sports or exercise            | 0.80            | 0.58-1.09        | 1.18            | 0.85-1.64        | 0.05              | -0.68-0.79        | 0.14             | -0.24-0.51 | 0.09             | -0.29-0.47  |
| Charitable                    | 1.05            | 0.75-1.48        | 0.90            | 0.63-1.27        | -0.22             | -0.99-0.54        | -0.16            | -0.55-0.23 | -0.30            | -0.69-0.10  |
| Social clubs                  | 0.98            | 0.70-1.37        | 0.84            | 0.59-1.18        | -0.20             | -0.95-0.54        | -0.29            | -0.67-0.09 | -0.19            | -0.58-0.19  |
| Political, union, environment | 1.37            | 0.91-2.07        | 0.90            | 0.59-1.38        | 0.17              | -0.76-1.10        | 0.14             | -0.34-0.61 | 0.11             | -0.37-0.59  |
| Resident or neighbourhood     | 0.91            | 0.67-1.25        | 1.28            | 0.95-1.77        | -0.31             | -1.03-0.41        | -0.12            | -0.49-0.26 | -0.01            | -0.38-0.36  |
| Other                         | 0.84            | 0.63-1.12        | 1.23            | 0.91-1.66        | -0.04             | -0.71-0.63        | 0.20             | -0.14-0.54 | 0.31             | -0.04-0.65  |

OR=odds ratio (logistic regression models);  $\beta$ =beta coefficient (linear regression models); CI=confidence intervals.

Adjusted for baseline wellbeing, sex, age, marital status, ethnicity, educational attainment, employment status, wealth, eyesight, hearing, having a chronic health condition (including cancer, COPD, arthritis, diabetes or angina) or having had a chronic health condition in the last 2 years (including cancer and a stroke) and chronic pain. Aged 55-64, n=1,504. Aged 65+, n=1,044.
